# Supplementary material for: Genomic Characteristics and Risk Factor Analysis of Carbapenem-non-susceptible pseudomonas aeruginosa Causing Bacteremia in a Tertiary Hospital (2014-2023)
Source: Research Square preprint supplement (doi:10.21203/rs.3.rs-7307226/v1), 2025-09-25
Supplement: Supplementary file 1 [file 184a1dbebd02142216fc9fb3.docx]

Table S1：The minimum inhibitory concentrations of 52 *Pseudomonas aeruginosa* isolates to antimicrobial agents

| Code | TCC | TZP | CAZ | CSP | FEP | IPM | MEM | AMK | TOB | CIP | LVX | COL |
| --- | --- | --- | --- | --- | --- | --- | --- | --- | --- | --- | --- | --- |
| 2745 | ≥ 128 (R) | 32 (I) | 2 (S) | ≥ 64 (R) | 8 (S) | ≥ 16 (R) | ≥ 16 (R) | ≤ 2 (S) | ≤ 1 (S) | 0.5 (I) | 4 (R) | 2 (S) |
| 3077 | 32 (I) | ≤ 4 (S) | 2 (S) | ≤ 8 (S) | 2 (S) | 8 (R) | 4 (I) | ≤ 2 (S) | ≤ 1 (S) | ≤ 0.25 (S) | 0.5 (S) | 2 (S) |
| 3206 | ≥ 128 (R) | ≥ 128 (R) | ≥ 64 (R) | ≥ 64 (R) | 8 (S) | ≥ 16 (R) | ≥ 16 (R) | 16 (S) | ≤ 1 (S) | 1 (I) | 4 (R) | ≤ 0.5 (S) |
| 3567 | ≥ 128 (R) | ≥ 128 (R) | 2 (S) | ≥ 64 (R) | ≥ 32 (R) | ≥ 16 (R) | ≥ 16 (R) | ≥ 64 (R) | ≥ 16 (R) | 2 (R) | ≥ 8 (R) | ≤ 0.5 (S) |
| 4087 | ≥ 128 (R) | ≥ 128 (R) | ≥ 64 (R) | ≥ 64 (R) | ≥ 32 (R) | ≥ 16 (R) | ≥ 16 (R) | 4 (S) | ≥ 16 (R) | ≥ 4 (R) | ≥ 8 (R) | ≤ 0.5 (S) |
| 4591 | ≥ 128 (R) | 64 (R) | 16 (I) | ≥ 64 (R) | 8 (I) | ≥ 16 (R) | ≥ 16 (R) | ≤ 2 (S) | ≤ 1 (S) | ≥ 4 (R) | ≥ 8 (R) | ≤ 0.5 (S) |
| 4996 | ≥ 128 (R) | ≥ 128 (R) | ≥ 64 (R) | ≥ 64 (R) | ≥ 32 (R) | ≥ 16 (R) | ≥ 16 (R) | ≥ 64 (R) | ≥ 16 (R) | ≥ 4 (R) | ≥ 8 (R) | 2 (S) |
| 5241 | 16 (S) | 16 (S) | 2 (S) | 16 (S) | 8 (S) | ≥ 16 (R) | ≥ 16 (R) | ≤ 2 (S) | ≤ 1 (S) | 1 (I) | 2 (I) | ≤ 0.5 (S) |
| 5454 | 16 (S) | ≤ 4 (S) | 2 (S) | ≤ 8 (S) | 1 (S) | ≥ 16 (R) | 1 (S) | 4 (S) | ≤ 1 (S) | 2 (R) | ≥ 8 (R) | 2 (S) |
| 5563 | 16 (S) | 8 (S) | 2 (S) | ≤ 8 (S) | 2 (S) | ≥ 16 (R) | 4 (I) | ≤ 2 (S) | ≤ 1 (S) | ≤ 0.25 (S) | 0.5 (S) | ≤ 0.5 (S) |
| 6012 | 16 (S) | ≤ 4 (S) | 2 (S) | ≤ 8 (S) | 0.5 (S) | 8 (R) | 4 (I) | ≤ 2 (S) | ≤ 1 (S) | ≥ 4 (R) | ≥ 8 (R) | 1 (S) |
| 6650 | ≥ 128 (R) | 16 (S) | 8 (S) | 16 (S) | 2 (S) | ≥ 16 (R) | ≥ 16 (R) | ≤ 2 (S) | ≤ 1 (S) | 0.5 (I) | 1 (S) | ≤ 0.5 (S) |
| 6868 | 16 (S) | 8 (S) | 2 (S) | ≤ 8 (S) | 2 (S) | ≥ 16 (R) | 4 (I) | ≤ 2 (S) | ≤ 1 (S) | ≤ 0.25 (S) | 1 (S) | 2 (S) |
| 7106 | ≥ 128 (R) | ≥ 128 (R) | 32 (R) | ≥ 64 (R) | ≥ 32 (R) | ≥ 16 (R) | ≥ 16 (R) | ≥ 64 (R) | ≥ 16 (R) | ≥ 4 (R) | ≥ 8 (R) | 2 (S) |
| 7166 | ≥ 128 (R) | 16 (S) | 2 (S) | 16 (S) | 4 (S) | ≥ 16 (R) | ≥ 16 (R) | ≤ 2 (S) | ≤ 1 (S) | ≥ 4 (R) | ≥ 8 (R) | 2 (S) |
| 7318 | 32 (I) | 8 (S) | 2 (S) | ≤ 8 (S) | 4 (S) | 8 (R) | 4 (I) | ≤ 2 (S) | ≤ 1 (S) | ≤ 0.25 (S) | 0.25 (S) | 2 (S) |
| 7339 | 16 (S) | ≤ 4 (S) | 2 (S) | ≤ 8 (S) | 2 (S) | ≥ 16 (R) | 4 (I) | ≤ 2 (S) | ≤ 1 (S) | ≤ 0.25 (S) | 0.5 (S) | 2 (S) |
| 7409 | 16 (S) | ≤ 4 (S) | 2 (S) | ≤ 8 (S) | 2 (S) | 8 (R) | 1 (S) | ≤ 2 (S) | ≤ 1 (S) | 1 (I) | 4 (R) | 2 (S) |
| 8681 | 32 (I) | ≤ 4 (S) | 2 (S) | ≤ 8 (S) | 8 (S) | ≥ 16 (R) | 8 (R) | 16 (S) | ≤ 1 (S) | ≤ 0.25 (S) | 1 (S) | 2 (S) |
| 9002 | 16 (S) | ≤ 4 (S) | 2 (S) | ≤ 8 (S) | 2 (S) | ≥ 16 (R) | 4 (I) | ≤ 2 (S) | ≤ 1 (S) | ≤ 0.25 (S) | 0.5 (S) | 2 (S) |
| 9137 | ≥ 128 (R) | ≥ 128 (R) | ≥ 64 (R) | ≥ 64 (R) | ≥ 32 (R) | ≥ 16 (R) | ≥ 16 (R) | ≥ 64 (R) | ≥ 16 (R) | ≥ 4 (R) | ≥ 8 (R) | ≤ 0.5 (S) |
| 9524 | ≥ 128 (R) | 32 (I) | 16 (I) | ≥ 64 (R) | 16 (I) | ≥ 16 (R) | ≥ 16 (R) | 8 (S) | ≤ 1 (S) | ≥ 4 (R) | ≥ 8 (R) | 2 (S) |
| 9615 | ≥ 128 (R) | 8 (S) | 2 (S) | 16 (S) | 2 (S) | ≥ 16 (R) | ≥ 16 (R) | ≤ 2 (S) | ≤ 1 (S) | ≤ 0.25 (S) | 1 (S) | 2 (S) |
| 10041 | ≥ 128 (R) | ≥ 128 (R) | 8 (S) | ≥ 64 (R) | 8 (S) | ≥ 16 (R) | ≥ 16 (R) | 4 (S) | ≤ 1 (S) | 1 (I) | ≥ 8 (R) | 2 (S) |
| 10291 | ≥ 128 (R) | 16 (S) | 2 (S) | ≤ 8 (S) | 4 (S) | ≥ 16 (R) | ≥ 16 (R) | 8 (S) | ≤ 1 (S) | ≤ 0.25 (S) | 1 (S) | 2 (S) |
| 11381 | 16 (S) | 16 (S) | 2 (S) | ≤ 8 (S) | 8 (S) | ≥ 16 (R) | 4 (I) | 4 (S) | ≤ 1 (S) | ≤ 0.25 (S) | 1 (S) | 2 (S) |
| 11638 | 32 (I) | 8 (S) | 2 (S) | ≤ 8 (S) | 2 (S) | ≥ 16 (R) | 4 (I) | ≤ 2 (S) | ≤ 1 (S) | 2 (R) | 4 (R) | 2 (S) |
| 11749 | ≥ 128 (R) | ≥ 128 (R) | ≥ 64 (R) | ≥ 64 (R) | ≥ 32 (R) | ≥ 16 (R) | ≥ 16 (R) | ≥ 64 (R) | ≥ 16 (R) | ≥ 4 (R) | ≥ 8 (R) | ≤ 0.5 (S) |
| 12218 | 64 (I) | 16 (S) | 2 (S) | 16 (S) | 8 (S) | ≥ 16 (R) | 8 (R) | 32 (I) | 4 (R) | 2 (R) | ≥ 8 (R) | 2 (S) |
| 12253 | ≥ 128 (R) | ≥ 128 (R) | ≥ 64 (R) | ≥ 64 (R) | ≥ 32 (R) | ≥ 16 (R) | ≥ 16 (R) | ≥ 64 (R) | ≥ 16 (R) | 0.5 (S) | 1 (S) | ≤ 0.5 (S) |
| 13101 | ≥ 128 (R) | ≥ 128 (R) | 8 (S) | 32 (I) | 8 (S) | ≥ 16 (R) | ≥ 16 (R) | ≤ 2 (S) | ≤ 1 (S) | ≤ 0.25 (S) | 2 (I) | 2 (S) |
| 13576 | ≥ 128 (R) | ≥ 128 (R) | 32 (R) | ≥ 64 (R) | 16 (I) | ≥ 16 (R) | ≥ 16 (R) | ≤ 2 (S) | ≤ 1 (S) | 1 (I) | 4 (R) | 2 (S) |
| 13910 | ≥ 128 (R) | 16 (S) | 2 (S) | 16 (S) | 8 (S) | ≥ 16 (R) | ≥ 16 (R) | 4 (S) | ≤ 1 (S) | ≥ 4 (R) | ≥ 8 (R) | 2 (S) |
| 14400 | ≥ 128 (R) | 32 (I) | 2 (S) | 16 (S) | 8 (S) | ≥ 16 (R) | ≥ 16 (R) | ≤ 2 (S) | ≤ 1 (S) | ≥ 4 (R) | ≥ 8 (R) | 2 (S) |
| 14564 | ≥ 128 (R) | ≥ 128 (R) | 32 (R) | ≥ 64 (R) | 16 (I) | ≥ 16 (R) | ≥ 16 (R) | 32 (I) | ≤ 1 (S) | ≥ 4 (R) | ≥ 8 (R) | 2 (S) |
| 14700 | ≤ 8 (S) | ≤ 4 (S) | 1 (S) | ≤ 8 (S) | 16 (I) | ≥ 16 (R) | 2 (S) | 4 (S) | ≤ 1 (S) | ≤ 0.25 (S) | 1 (S) | ≤ 0.5 (S) |
| 14760 | 16 (S) | 8 (S) | 2 (S) | ≤ 8 (S) | 8 (S) | ≥ 16 (R) | 4 (I) | 4 (S) | ≤ 1 (S) | ≤ 0.25 (S) | 1 (S) | ≤ 0.5 (S) |
| 15145 | 64 (I) | ≥ 128 (R) | 2 (S) | 16 (S) | 8 (S) | ≥ 16 (R) | ≥ 16 (R) | 8 (S) | ≤ 1 (S) | ≤ 0.25 (S) | 1 (S) | 2 (S) |
| 15232 | 32 (I) | 8 (S) | 2 (S) | ≤ 8 (S) | 2 (S) | ≥ 16 (R) | 4 (I) | ≤ 2 (S) | ≤ 1 (S) | ≤ 0.25 (S) | 0.5 (S) | 2 (S) |
| 15508 | 64 (I) | 64 (R) | 8 (S) | 32 (I) | 4 (S) | ≥ 16 (R) | ≥ 16 (R) | 8 (S) | ≤ 1 (S) | ≤ 0.25 (S) | 1 (S) | 2 (S) |
| 16093 | ≥ 128 (R) | ≥ 128 (R) | ≥ 64 (R) | ≥ 64 (R) | 16 (I) | ≥ 16 (R) | ≥ 16 (R) | ≤ 2 (S) | ≤ 1 (S) | 2 (R) | ≥ 8 (R) | 2 (S) |
| 16194 | ≥ 128 (R) | ≥ 128 (R) | ≥ 64 (R) | ≥ 64 (R) | 16 (I) | ≥ 16 (R) | ≥ 16 (R) | ≤ 2 (S) | ≤ 1 (S) | ≤ 0.25 (S) | 1 (S) | ≤ 0.5 (S) |
| 16359 | ≥ 128 (R) | 32 (I) | 2 (S) | 16 (S) | 8 (S) | ≥ 16 (R) | ≥ 16 (R) | ≤ 2 (S) | ≤ 1 (S) | 0.5 (I) | 4 (R) | 2 (S) |
| 17448 | ≥ 128 (R) | ≥ 128 (R) | 8 (S) | ≥ 64 (R) | 8 (S) | 4 (I) | 1 (S) | 4 (S) | 2 (I) | 0.5 (S) | 2 (I) | 2 (S) |
| 17767 | 16 (S) | ≤ 4 (S) | 2 (S) | ≤ 8 (S) | 2 (S) | ≥ 16 (R) | 4 (I) | ≤ 2 (S) | ≤ 1 (S) | ≤ 0.25 (S) | 0.5 (S) | ≤ 0.5 (S) |
| 17774 | 16 (S) | 8 (S) | 2 (S) | ≤ 8 (S) | 2 (S) | ≥ 16 (R) | 4 (I) | ≤ 2 (S) | ≤ 1 (S) | ≤ 0.25 (S) | 1 (S) | ≤ 0.5 (S) |
| 17809 | 16 (S) | 8 (S) | 2 (S) | ≤ 8 (S) | 2 (S) | ≥ 16 (R) | 4 (I) | ≤ 2 (S) | ≤ 1 (S) | 0.5 (S) | 0.5 (S) | 2 (S) |
| 18612 | ≥ 128 (R) | ≥ 128 (R) | 8 (S) | ≥ 64 (R) | 8 (S) | ≥ 16 (R) | ≥ 16 (R) | ≤ 2 (S) | ≤ 1 (S) | 0.5 (I) | 4 (R) | 2 (S) |
| 18985 | ≥ 128 (R) | ≥ 128 (R) | 2 (S) | 32 (I) | 8 (S) | ≥ 16 (R) | ≥ 16 (R) | 4 (S) | ≤ 1 (S) | ≤ 0.25 (S) | ≤ 0.12 (S) | ≤ 0.5 (S) |
| 19199 | ≥ 128 (R) | 8 (S) | 2 (S) | ≥ 64 (R) | 8 (S) | ≥ 16 (R) | ≥ 16 (R) | ≤ 2 (S) | ≤ 1 (S) | ≤ 0.25 (S) | ≤ 0.12 (S) | ≤ 0.5 (S) |
| 19686 | ≥ 128 (R) | ≥ 128 (R) | ≥ 64 (R) | ≥ 64 (R) | 16 (I) | ≥ 16 (R) | ≥ 16 (R) | ≥ 64 (R) | ≥ 16 (R) | ≥ 4 (R) | ≥ 8 (R) | 2 (S) |
| 19733 | ≥ 128 (R) | 8 (S) | 2 (S) | 16 (S) | 8 (S) | ≥ 16 (R) | ≥ 16 (R) | 8 (S) | ≥ 16 (R) | ≥ 4 (R) | ≥ 8 (R) | 2 (S) |

TCC, Ticarcillin-clavulanate; TZP, piperacillin-tazobactam; CAZ, ceftazidime; CSP, Cefoperazone-Sulbactam; FEP, cefepime; IMP, imipenem; MEM, meropenem; AMK, amikacin; TOB, tobramycin; CIP, Ciprofloxacin; LVX, levofloxacin; COL, Colistin; I: Intermediate; R: Resistance; S, susceptible;
